# Supplementary material for: A two-dimensional perovskite oxyfluoride Pb3Fe2O5F2 as a catalyst for electrochemical oxidation of water to oxygen
Source: Royal Society of Chemistry journal article supplement (doi:10.1039/d2se00282e), 2022-01-01
Supplement: d2se00282e1.pdf [file d2se00282e1.pdf]

*Electronic Supplementary Information (ESI)*

A two-dimensional perovskite oxyfluoride  $\text{Pb}_3\text{Fe}_2\text{O}_5\text{F}_2$  as a catalyst for electrochemical oxidation of water to oxygen

*Ryusuke Mizuochi,<sup>a</sup> Kengo Oka,<sup>b</sup> Yoshiyuki Inaguma,<sup>c</sup> and Kazuhiko Maeda<sup>\*a</sup>*

<sup>a</sup> Department of Chemistry, School of Science, Tokyo Institute of Technology, 2-12-1-NE-2 Ookayama, Meguro-ku, Tokyo 152-8550, Japan

<sup>b</sup> Department of Applied Chemistry, Faculty of Science and Engineering, Kindai University, 3-4-1 Kowakae, Higashi-osaka City, Osaka 577-8502, Japan

<sup>c</sup> Department of Chemistry, Faculty of Science, Gakushuin University, 1-5-1 Mejiro, Toshima-ku, Tokyo 171-8588, Japan

\*To whom correspondence should be addressed.

Email: [maedak@chem.titech.ac.jp](mailto:maedak@chem.titech.ac.jp)

## **Experimental**

### **Synthesis of Pb<sub>3</sub>Fe<sub>2</sub>O<sub>5</sub>F<sub>2</sub> and PbFeO<sub>2</sub>F**

In accordance with a previous report,<sup>1</sup> Pb<sub>3</sub>Fe<sub>2</sub>O<sub>5</sub>F<sub>2</sub> powder was synthesized through a solid-state reaction in vacuum. A mixture of PbO (99.9%, Rare Metallic Co. Ltd.), PbF<sub>2</sub> (99.9%, Mitsuwa Pure Chemical), and α-Fe<sub>2</sub>O<sub>3</sub> (99.9%, FUJIFILM Wako Pure Chemical) powders, prepared in the ratio (molar basis) PbO:PbF<sub>2</sub>:α-Fe<sub>2</sub>O<sub>3</sub> = 2:1:1, was wrapped in a Pt sheet and then heated at 873 K for 12 hours in an evacuated Pyrex tube.

PbFeO<sub>2</sub>F powder was synthesized through a solid-state reaction at high pressure, using a mixture of PbO (99.9%, Kanto Chemical), PbF<sub>2</sub> 99.999%, Soekawa Chemical) and Fe<sub>2</sub>O<sub>3</sub> (99.99%, Rare Metallic).<sup>2</sup> A stoichiometric mixture of the starting materials was dried overnight by evacuating at ca. 573 K. The mixture was sealed in a gold capsule (0.2 mm thick, 3.1 mm inner diameter, and 3.2 mm depth), which was placed in a NaCl sleeve. The sample was then inserted into a pyrophyllite cube block (one side 13 mm) with a cylindrical graphite heater. The mixture was allowed to react in a TRY cubic multianvil-type high pressure apparatus (NAMO 2001) at 6.0 GPa and 1173 K for 30 min and then was quenched to room temperature.

The single-phase production of PbFeO<sub>2</sub>F and Pb<sub>3</sub>Fe<sub>2</sub>O<sub>5</sub>F<sub>2</sub> was confirmed by X-ray diffraction (XRD).

### **Characterization**

The purity of the phases in the synthesized samples was confirmed by XRD using a Rigaku MiniFlex600 diffractometer (monochromatic radiation: Cu Kα). Scanning electron microscopy (SEM) observations combined with energy-dispersive X-ray spectroscopy (EDS) measurements were conducted on a JEOL JSM-IT100 equipped with a KEYENCE VE-9800 apparatus.

### **Preparation of Pb<sub>3</sub>Fe<sub>2</sub>O<sub>5</sub>F<sub>2</sub> and PbFeO<sub>2</sub>F electrodes**

A Pb<sub>3</sub>Fe<sub>2</sub>O<sub>5</sub>F<sub>2</sub>/FTO electrode was prepared by performing electrophoretic deposition in 50 mL of acetone (>99.5%, Kanto Chemical) containing ca. 100 mg Pb<sub>3</sub>Fe<sub>2</sub>O<sub>5</sub>F<sub>2</sub> powder and ca. 20 mg iodine (>99.8%, FUJIFILM Wako Pure Chemical).<sup>3</sup> Two fluorine-doped tin oxide (FTO) substrates in parallel were immersed in the solution with a separation of ca. 15 mm, and then a voltage of 30 V was applied between the substrates for 2 minutes using a stabilized DC power supply (PSW 80–13.5, GW Instek). The Pb<sub>3</sub>Fe<sub>2</sub>O<sub>5</sub>F<sub>2</sub> deposited area was 3.8 cm<sup>2</sup> (ca. 1.5 cm × 2.5 cm). After that, the as-deposited Pb<sub>3</sub>Fe<sub>2</sub>O<sub>5</sub>F<sub>2</sub>/FTO electrode was heated at 573 K for one hour to enhance the conductivity in the electrode. A PbFeO<sub>2</sub>F/FTO electrode was also prepared in the same way. The amount of particles deposited onto the FTO substrate was 4–5 mg.

### **Electrochemical measurements**

Electrochemical measurements were performed using a potentiostat (HZ-Pro, Hokuto Denko) and an electrochemical cell at room temperature. The cell body was made of Pyrex glass, and was a three-electrode-type system equipped with a Pt wire and an Ag/AgCl electrode (saturated KCl aqueous solution) as the counter and reference electrodes, respectively. 0.1 M aqueous K<sub>3</sub>PO<sub>4</sub> (>98.0%, Sigma-Aldrich) solution served as the electrolyte, which was saturated with argon gas prior to undertaking measurements. The potentials measured by the Ag/AgCl reference electrode were converted to those with respect to the reversible hydrogen electrode (RHE,  $E_{\text{RHE}} = E_{\text{Ag/AgCl}} + 0.059 \text{ pH} + 0.197$  at 298 K). In this work, the electrocatalytic activities were reported based on the use of current densities per geometric area of electrode ( $\mu\text{A cm}^{-2}_{\text{geo}}$ ).

Electrochemical impedance spectroscopy measurement was conducted using the same potentiostat and electrochemical setup. This measurement conditions were set to an AC amplitude of 10 mV and a frequency range of 100 kHz to 0.1 Hz.

### **Quantification of electrochemical O<sub>2</sub> evolution**

Quantification of the O<sub>2</sub> evolved during controlled-potential electrolysis was performed with a gastight H-type electrochemical cell that had two chambers parted by a perfluorinated membrane (Nafion 117, Sigma-Aldrich). The Pb<sub>3</sub>Fe<sub>2</sub>O<sub>5</sub>F<sub>2</sub>/FTO working and the Ag/AgCl reference electrode were separated from a Pt wire counter electrode in each chamber. The cell operating conditions

### Electronic Supplementary Information (ESI)

were identical to those in the above description of the electrochemical measurements. The evolved  $O_2$  was detected using a gas chromatograph (MGC3000A, Inficon) equipped with a thermal conductivity detector and an MS-5A column. Argon gas was used as the carrier gas in the gas chromatograph.

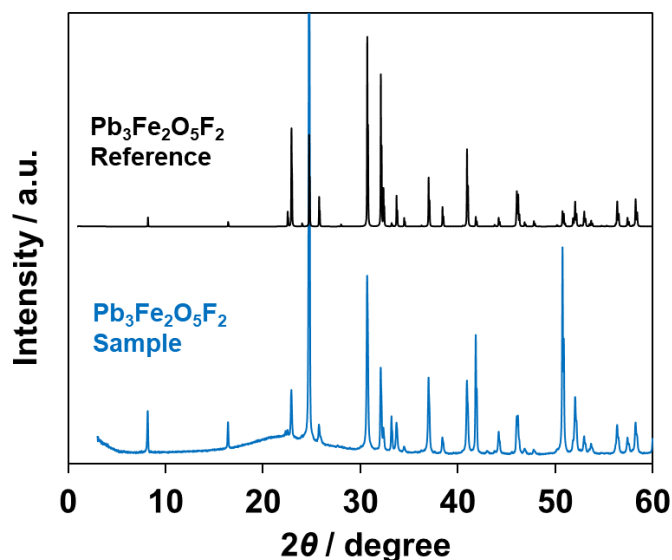

**Fig. S1.** XRD patterns for the synthesized  $Pb_3Fe_2O_5F_2$  and the reference. The pattern for the reference was drawn based on published crystallographic data.<sup>1</sup>

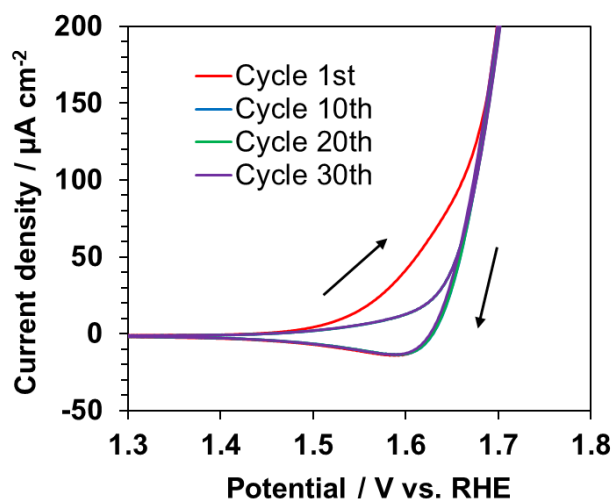

**Fig. S2.** Current–potential curves in each cycle for the  $Pb_3Fe_2O_5F_2/FTO$  electrode in aqueous 0.1 M  $K_3PO_4$  solution (pH 12.6), as recorded at a sweep rate of  $10\ mV\ s^{-1}$ . After the 10th scan, no change in the CV profile was observed, indicating that this electrode was sufficiently stable for water oxidation. The oxidation wave observed at +1.6–1.7 V vs. RHE in the 1st scan might show the oxidation of Fe and/or Pb species in the  $Pb_3Fe_2O_5F_2$ , as already mentioned in the main text.

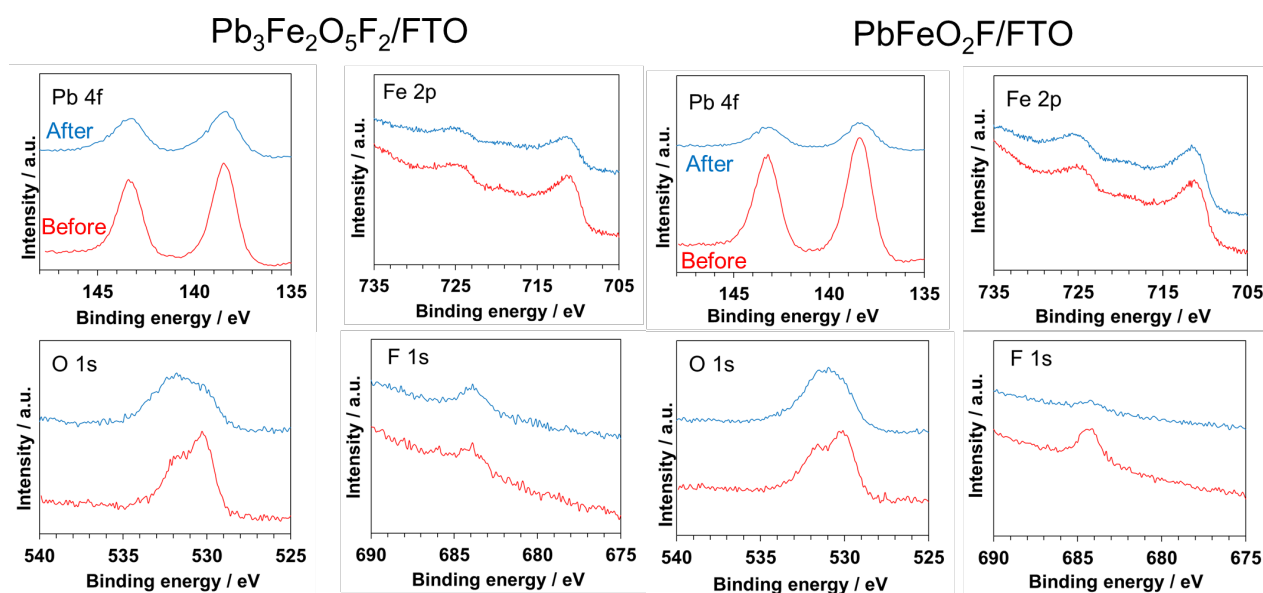

**Fig. S3.** Pb 4f, Fe 2p, O 1s and F 1s XPS data for the  $\text{Pb}_3\text{Fe}_2\text{O}_5\text{F}_2$  and  $\text{PbFeO}_2\text{F}$  electrodes before (red) and after (blue) the controlled-potential electrolysis (Fig. 5).

**Table S1.** Surface atomic ratios of the  $\text{Pb}_3\text{Fe}_2\text{O}_5\text{F}_2$  and  $\text{PbFeO}_2\text{F}$  electrodes before and after the controlled-potential electrolysis (Fig. 5)

| Entry | Electrode                                             | Surface atomic ratios <sup>a</sup> |      |
|-------|-------------------------------------------------------|------------------------------------|------|
|       |                                                       | Pb/Fe                              | F/Fe |
| 1     | $\text{Pb}_3\text{Fe}_2\text{O}_5\text{F}_2$ (before) | 0.61                               | 0.11 |
| 2     | $\text{Pb}_3\text{Fe}_2\text{O}_5\text{F}_2$ (after)  | 0.51                               | 0.14 |
| 3     | $\text{PbFeO}_2\text{F}$ (before)                     | 0.73                               | 0.20 |
| 4     | $\text{PbFeO}_2\text{F}$ (after)                      | 0.15                               | 0.06 |

<sup>a</sup> Determined by the corresponding XPS peak area.

## References

- 1 K. Oka, Y. Nambu, M. Ochi, N. Hayashi, Y. Kusano, T. Aoyama, Y. Ishii, K. Kuroki, S. Mori, M. Takano, M. Iwasaki, N. Noma and H. Kageyama, Spin orientation switching in layered perovskite oxyfluoride  $\text{Pb}_3\text{Fe}_2\text{O}_5\text{F}_2$ , 2021, DOI: 10.21203/rs.3.rs-678519/v1.
- 2 Y. Inaguma, J.-M. Greneche, M.-P. Crosnier-Lopez, T. Katsumata, Y. Calage and J.-L. Fourquet, Structure and Mössbauer Studies of F–O Ordering in Antiferromagnetic Perovskite  $\text{PbFeO}_2\text{F}$ , *Chem. Mater.*, 2005, **17**, 1386-1390.
- 3 L. Besra and M. Liu, A review on fundamentals and applications of electrophoretic deposition (EPD), *Prog. Mater. Sci.*, 2007, **52**, 1-61.
